# Supplementary material for: Sword Bean (Canavalia gladiata) Pod Exerts Anti-Allergic and Anti-Inflammatory Effects through Modulation of Th1/Th2 Cell Differentiation
Source: MDPI journal article supplement (doi:10.3390/nu14142853), 2022-07-12
Supplement: s1 [file s1]

**Table S1.** Nutritional composition of sword bean and pod.

| <b>Ingredients</b>                 | <b>SB</b> | <b>SBP</b> |
|------------------------------------|-----------|------------|
| <b>General component (g/100 g)</b> |           |            |
| Protein                            | 26.3      | 13.8       |
| Lipid                              | 1         | 9.8        |
| Moisture                           | 12        | 7.5        |
| <b>Mineral (mg/100 g)</b>          |           |            |
| Calcium                            | 84        | 324.5      |
| Phosphorus                         | 353       | 253.5      |
| Iron                               | 3.7       | 26.4       |
| Potassium                          | 1296      | 1549.7     |
| Sodium                             | 5         | 11.4       |
| <b>Vitamin (mg/100 g)</b>          |           |            |
| β-carotene                         | –         | 0.57       |
| Vitamin B1                         | 0.54      | 0.48       |
| Vitamin B2                         | 0.25      | 0.38       |
| Vitamin C                          | 0         | 27.15      |
| Niacin                             | 2         | 3.03       |

This data is presented based on 100 g of dry raw material. SB, sword bean; SBP, sword bean pod.
